# Supplementary material for: Programming a crystalline shape memory polymer network with thermo- and photo-reversible bonds toward a single-component soft robot
Source: PubMed Central journal article supplement — Sci Adv. 2018 Jan 26;4(1):eaao3865. doi: 10.1126/sciadv.aao3865 (PMC5787381; doi:10.1126/sciadv.aao3865), 2018-01-26
Supplement: aao3865_SM.pdf [file aao3865_SM.pdf]

## Supplementary Materials for

### **Programming a crystalline shape memory polymer network with thermo- and photo-reversible bonds toward a single-component soft robot**

Binjie Jin, Huijie Song, Ruiqi Jiang, Jizhou Song, Qian Zhao, Tao Xie

Published 26 January 2018, *Sci. Adv.* **4**, eaao3865 (2018)

DOI: 10.1126/sciadv.aao3865

#### **The PDF file includes:**

- fig. S1.  $^1\text{H}$  NMR spectra of the polymer precursors.
- fig. S2. Differential scanning calorimeter curve of the polyurethane network.
- fig. S3. Cyclic photo-programming and photo-erasing performance.
- fig. S4. Scheme for spatio-selective photo-defining reversible actuation onto a 3D shape.
- table S1. Photo-programming parameters for locally defined reversible shape memory materials (white area represents the exposed area of the sample).

#### **Other Supplementary Material for this manuscript includes the following:**

(available at [advances.sciencemag.org/cgi/content/full/4/1/eaao3865/DC1](https://advances.sciencemag.org/cgi/content/full/4/1/eaao3865/DC1))

- movie S1 (.mp4 format). Cyclic reversible actuation of the 3D crane (accelerated by 15).

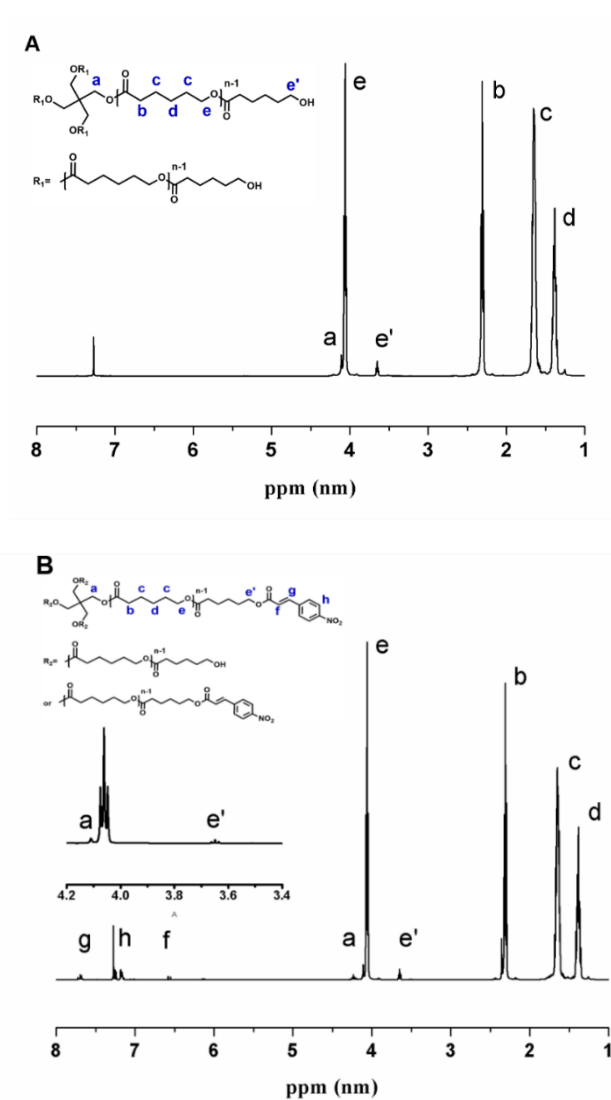

**fig. S1.  $^1\text{H}$  NMR spectra of the polymer precursors.** (A) Four-armed PCL, the number of repeat unit ( $n$ ) was calculated from the peak ratio between  $b$  and  $e'$ . (B) Nitro-cinnamate end functionalized PCL,  $R_c$  was calculated based on the peak ratio between  $a$  and  $e'$ . All spectra were collected using 500M (Bruker, Avance III) and  $\text{CDCl}_3$  as the solvent.

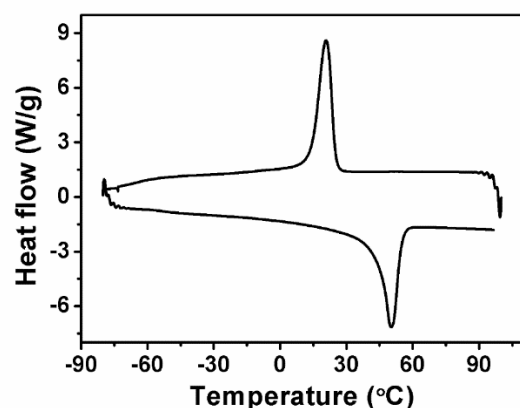

**fig. S2. Differential scanning calorimeter curve of the polyurethane network.** The test was carried on a TA Q200 machine with a scan speed of 10 °C/min.

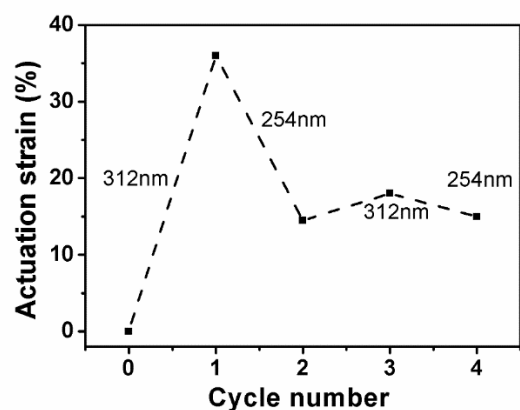

**fig. S3. Cyclic photo-programming and photo-erasing performance.** (sample  $R_c=0.47$ , pre-stretch strain=400%). The programming was conducted using 312 nm light ( $75 \text{ mW/cm}^2$ , 2 min) and the erasing process was performed using 254 nm light ( $1.3 \text{ mW/cm}^2$ , 5 hours).

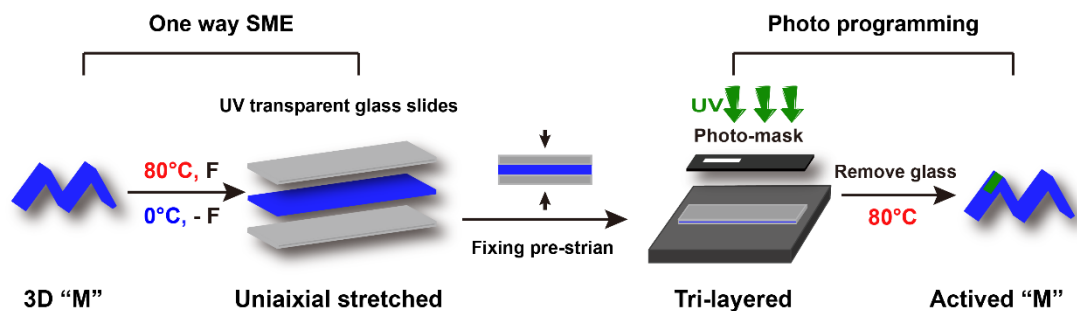

**fig. S4. Scheme for spatio-selective photo-defining reversible actuation onto a 3D shape.** The green and blue areas were active (with actuation) and inactive (without actuation) areas, respectively.

**table S1. Photo-programming parameters for locally defined reversible shape memory materials (white area represents the exposed area of the sample).**

|                              | Original size                                                                       | Pre-strain | Exposure time | Photo Patten                                                                                                                      |
|------------------------------|-------------------------------------------------------------------------------------|------------|---------------|-----------------------------------------------------------------------------------------------------------------------------------|
| Eight-peta<br>lled<br>flower | 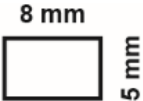   | 100 %      | 3 min         | 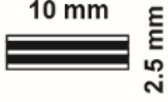<br><br>(three strips, each width is 0.5 mm)   |
| 3D “M”                       | 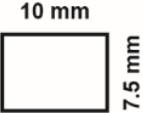   | 400%       | 2 min         | 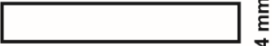                                               |
| 3D crane                     | 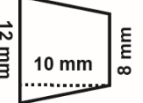 | 300 %      | 2 min         | 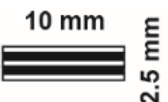<br><br>(three strips, each width is 0.5 mm) |
| 3D<br>elephant               | 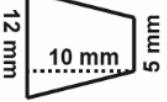 | 300 %      | 2 min         | 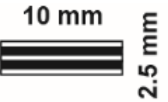<br><br>(three strips, each width is 0.5 mm) |
